# Supplementary material for: SERS Amplification in Au/Si Asymmetric Dimer Array Coupled to Efficient Adsorption of Thiophenol Molecules
Source: MDPI journal article supplement (doi:10.3390/nano11061521), 2021-06-08
Supplement: s1 [file s1]

# Supplementary Information

## *SERS amplification in Au/Si asymmetric dimer array coupled to efficient adsorption of thiophenol molecules*

Grégory Barbillon<sup>a</sup>, Andrey Ivanov<sup>b</sup>, Andrey K. Sarychev<sup>b</sup>

<sup>a</sup>EPF-Ecole d'Ingénieurs, 92330 Sceaux, France.

<sup>b</sup>Institute for Theoretical and Applied Electrodynamics, Russian Academy of Sciences, 125412, Moscow, Russia.

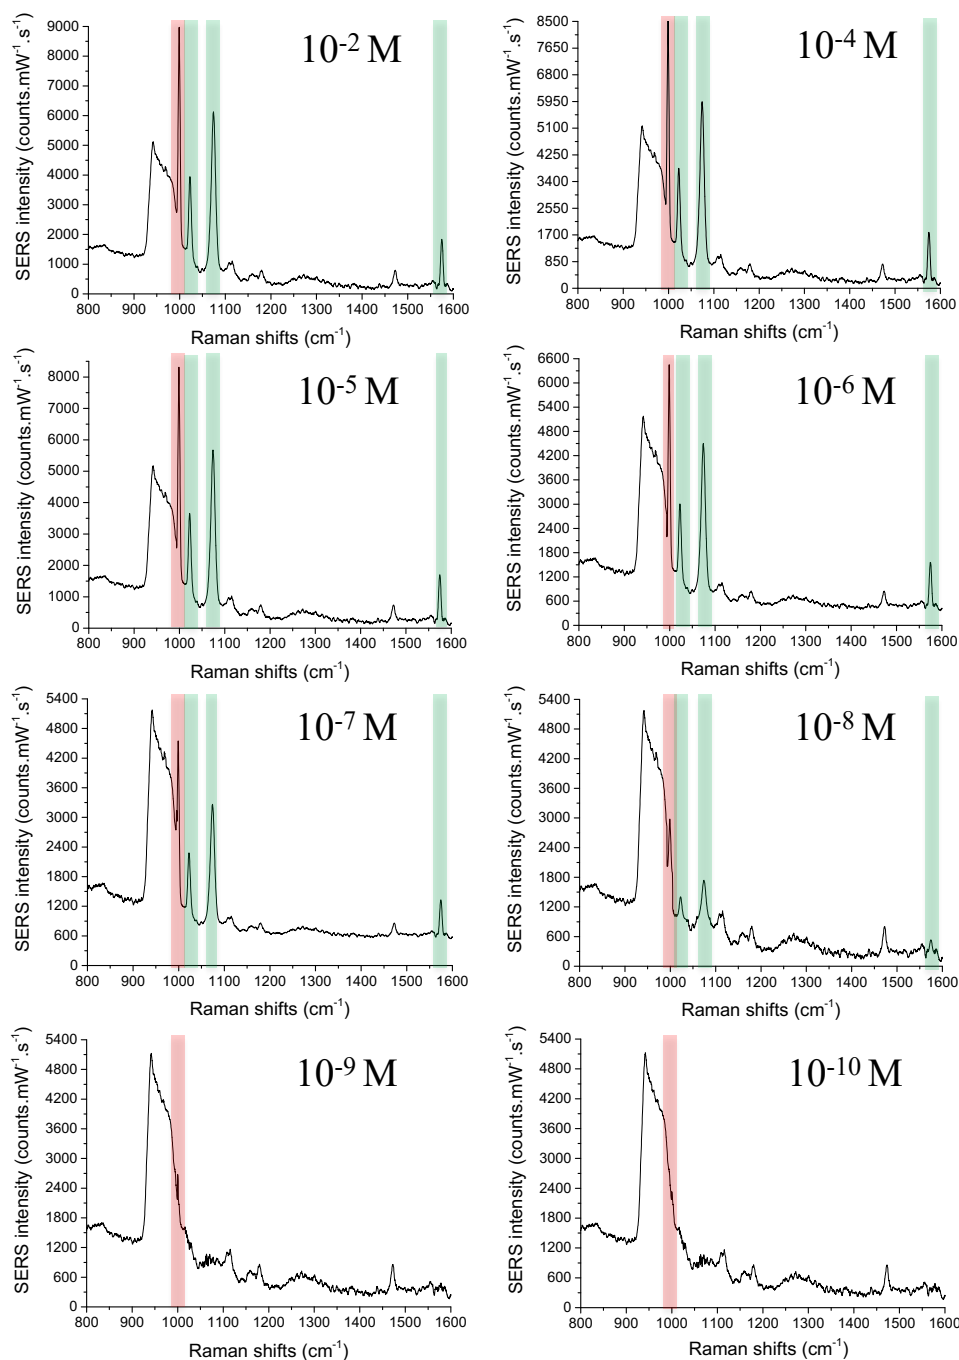

**Figure S1.** SERS spectra of thiophenol recorded at the excitation wavelength of 785 nm for the concentrations of 10<sup>-2</sup> M and from 10<sup>-4</sup> M to 10<sup>-10</sup> M, where the four Raman peaks are displayed, especially the Raman peak at 999 cm<sup>-1</sup> which is encapsulated in a red rectangle, and that we have chosen to use for assessing the sensitivity of hybrid asymmetric dimers.

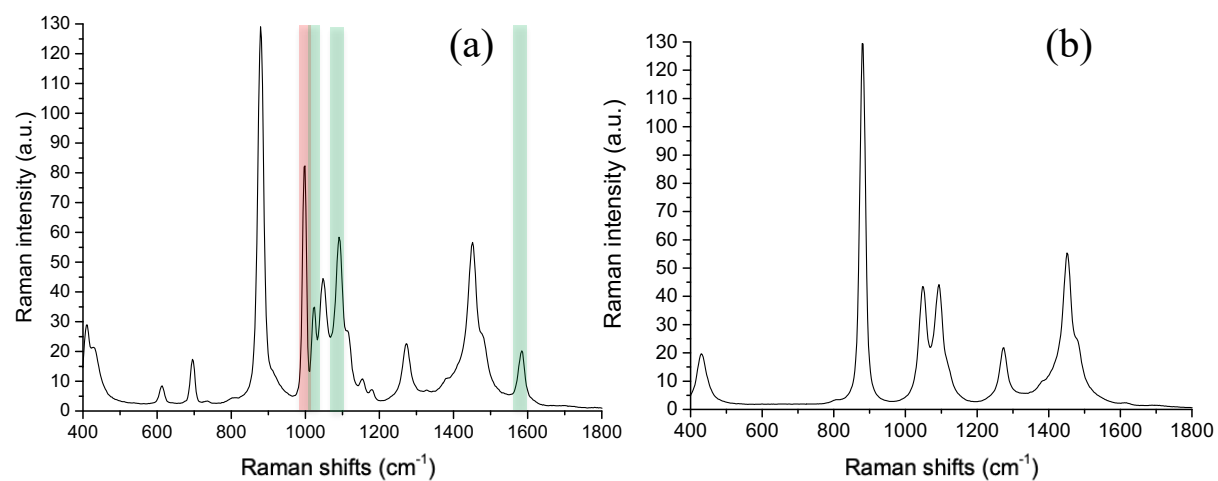

**Figure S2.** Raman spectra of (a) a thiophenol solution of 1 M (thiophenol + ethanol) and (b) the pure ethanol recorded at the excitation wavelength of 785 nm.
